# Supplementary material for: Combination of OX40 Co-Stimulation, Radiotherapy, and PD-1 Inhibition in a Syngeneic Murine Triple-Negative Breast Cancer Model
Source: MDPI journal article supplement (doi:10.3390/cancers14112692), 2022-05-29

**Supplementary S2. Mice body weight after treatment.**

Body weight of tumor-bearing mice treatment was measured every other day to evaluate treatment after treatment. Abbreviations: RT, radiation.

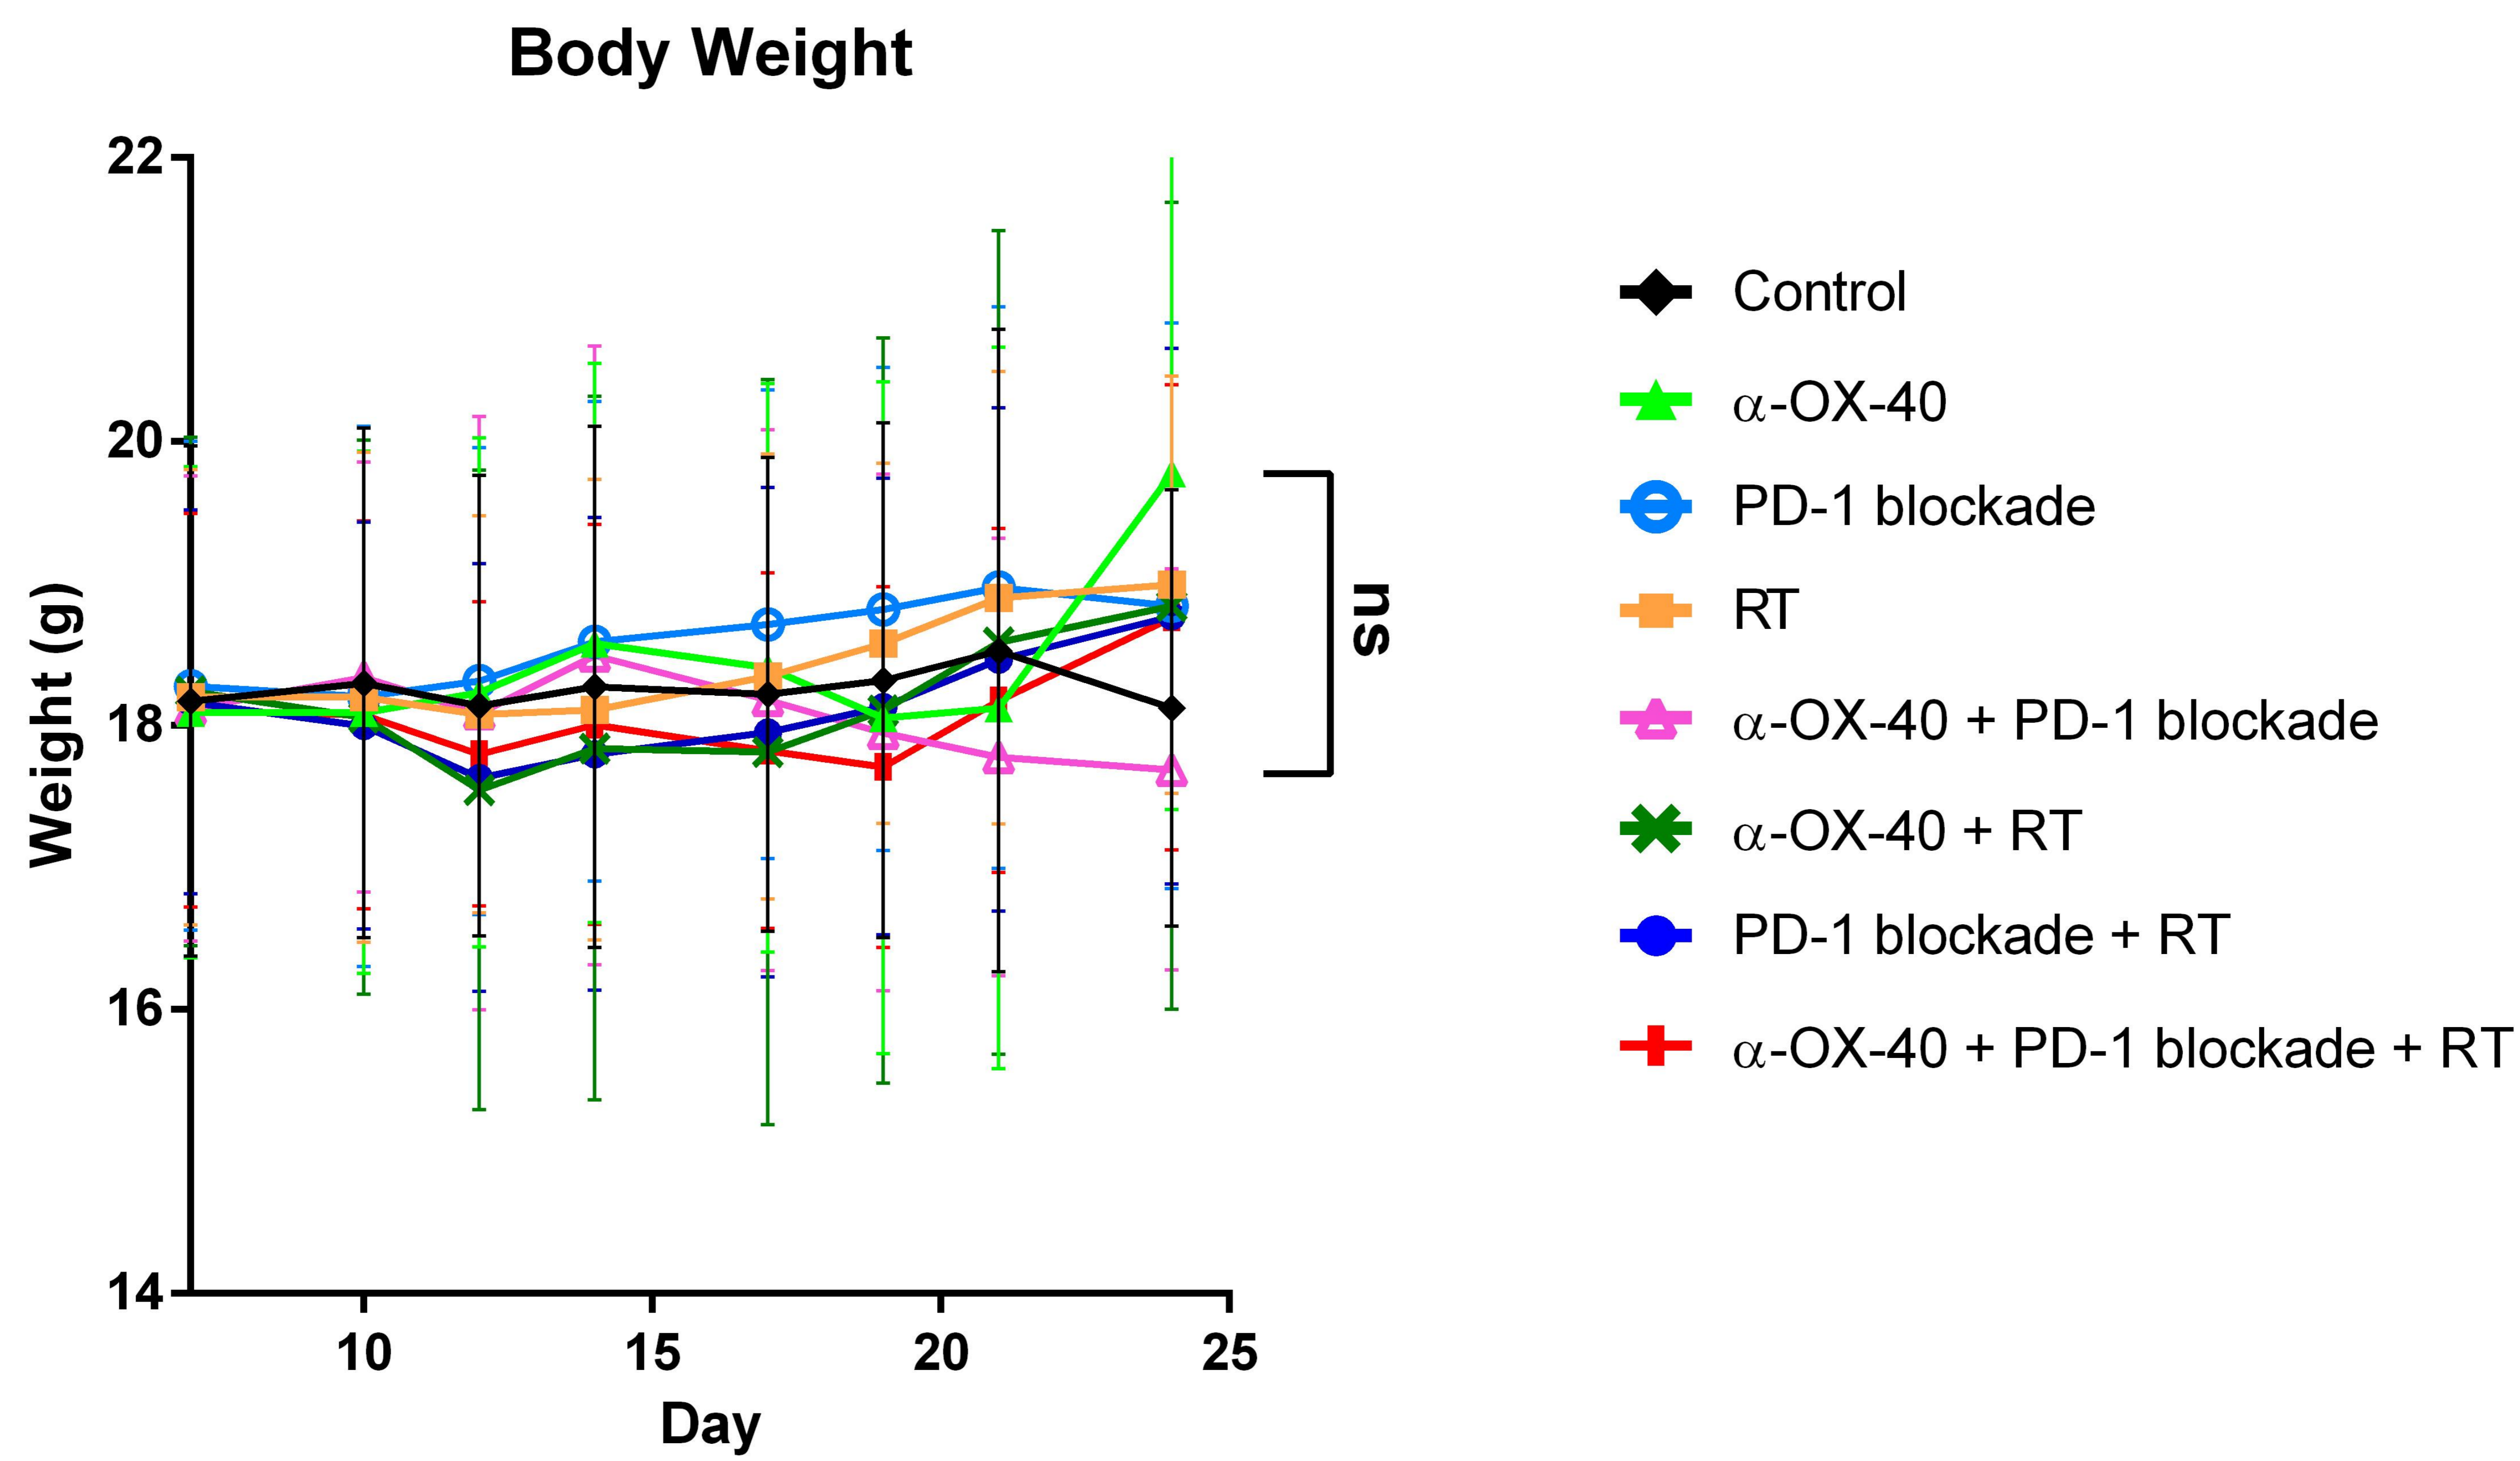

Supplement: s1 [file s1]
