# Supplementary material for: Combination of OX40 Co-Stimulation, Radiotherapy, and PD-1 Inhibition in a Syngeneic Murine Triple-Negative Breast Cancer Model
Source: MDPI journal article supplement (doi:10.3390/cancers14112692), 2022-05-29

**Supplementary S1. CD4+ T-cell profiles in the spleen and tumor microenvironment.** Percentage of (a) CD4+ and (b) effector memory CD4+ T-cell population in spleen is plotted from each flow cytometry analysis. (c) Immunohistochemistry results for CD4+ T cells in the tumor microenvironment. \*P < 0.05, \*\*P < 0.01, \*\*\*P < 0.001, \*\*\*\*P < 0.0001, and ns = not significant. **Abbreviations:** CON, control; RT, radiation; PD-1B, PD-1 blockade.

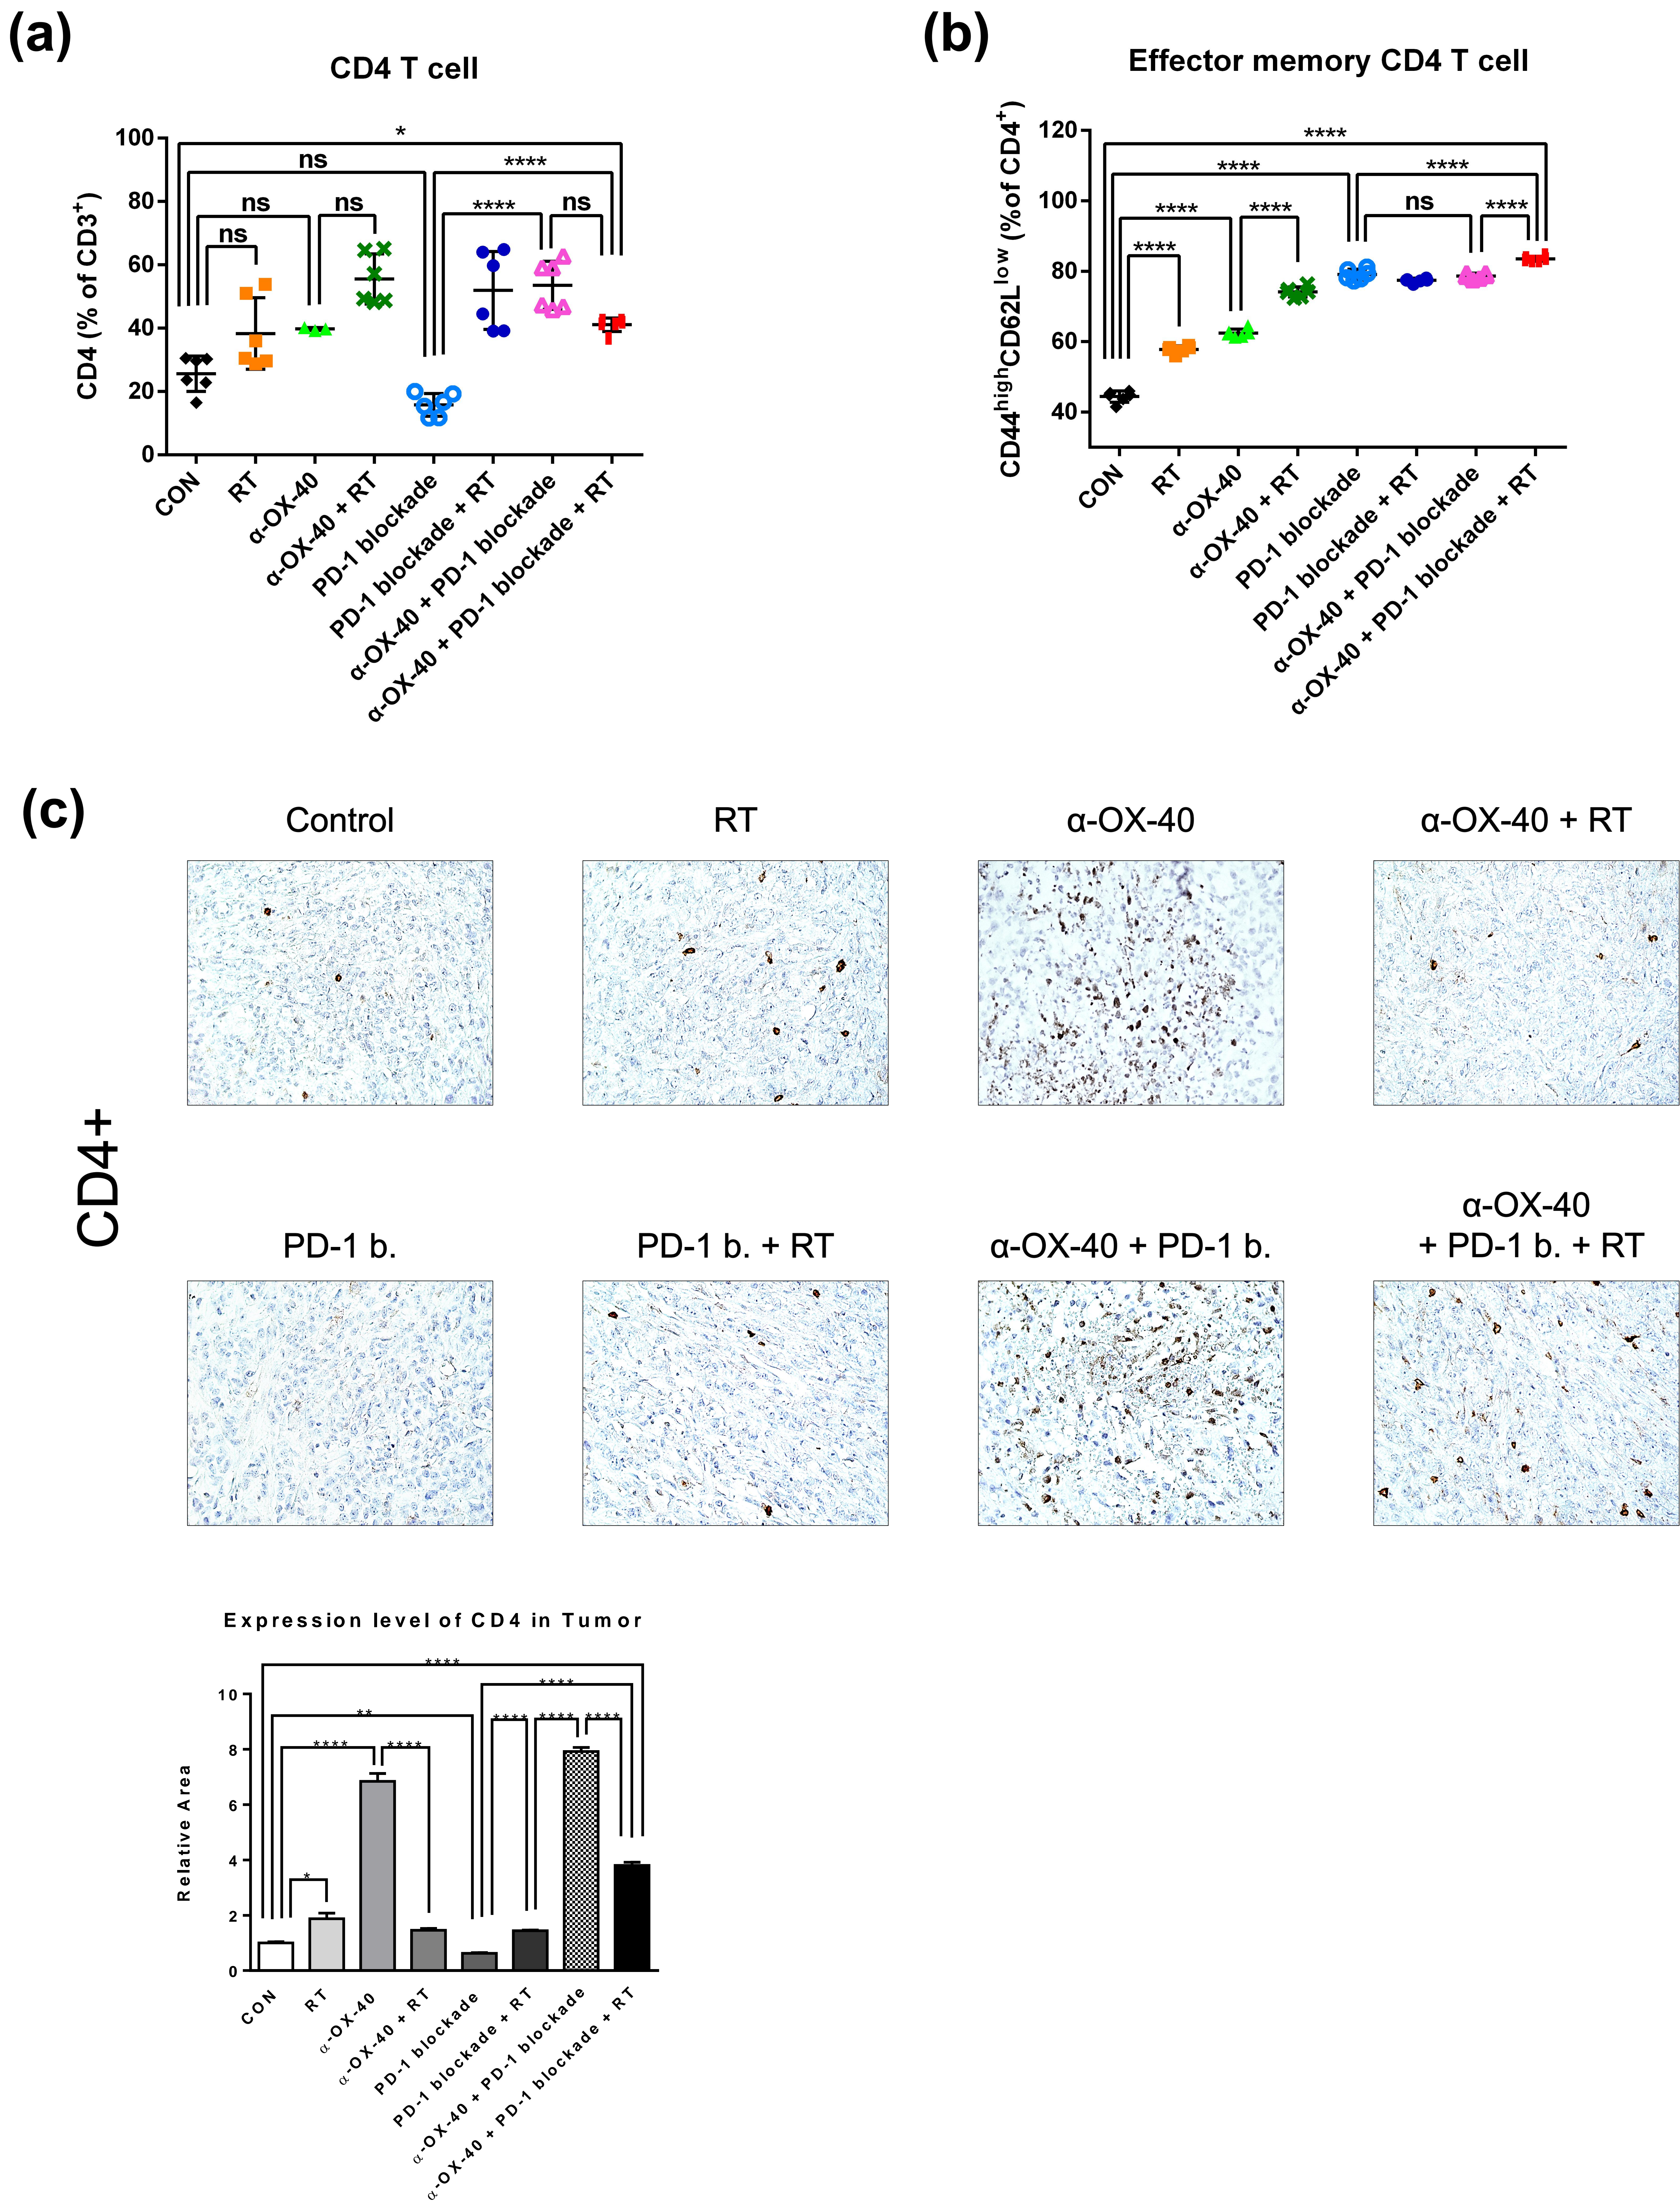

Supplement: s1 [file s1]
